# Supplementary material for: Comparing physician associates and foundation year 1 doctors-in-training undertaking emergency medicine consultations in England: a quantitative study of outcomes
Source: PubMed Central journal article supplement — BMJ Open. 2024 Jan 6;14(1):e078511. doi: 10.1136/bmjopen-2023-078511 (PMC10773349; doi:10.1136/bmjopen-2023-078511), 2024-01-06
Supplement: bmjopen-2023-078511supp001.pdf [file bmjopen-2023-078511supp001.pdf]

| Clinician Study ID | PA_or_FY1_Fc | Arrival_Date_Time | Arrival_Time | Arrival_Hour_Fc |
|--------------------|--------------|-------------------|--------------|-----------------|
| 9                  | 1            | 01/08/2018        | 09:36:00     | 9               |
| 13                 | 1            | 01/08/2018        | 13:44:00     | 13              |
| 13                 | 1            | 01/08/2018        | 13:58:00     | 13              |
| 14                 | 2            | 01/08/2018        | 14:01:00     | 14              |
| 14                 | 2            | 01/08/2018        | 14:01:00     | 14              |
| 15                 | 2            | 01/08/2018        | 15:25:00     | 15              |
| 15                 | 2            | 01/08/2018        | 15:45:00     | 15              |
| 17                 | 2            | 01/08/2018        | 17:12:00     | 17              |
| 6                  | 1            | 02/08/2018        | 06:43:00     | 6               |
| 7                  | 2            | 02/08/2018        | 07:34:00     | 7               |
| 9                  | 2            | 02/08/2018        | 09:02:00     | 9               |
| 9                  | 2            | 02/08/2018        | 09:19:00     | 9               |
| 10                 | 1            | 02/08/2018        | 10:58:00     | 10              |
| 12                 | 2            | 02/08/2018        | 12:00:00     | 12              |
| 12                 | 2            | 02/08/2018        | 12:07:00     | 12              |
| 12                 | 1            | 02/08/2018        | 12:34:00     | 12              |
| 12                 | 1            | 02/08/2018        | 12:49:00     | 12              |
| 13                 | 2            | 02/08/2018        | 13:39:00     | 13              |
| 13                 | 1            | 02/08/2018        | 13:54:00     | 13              |
| 15                 | 1            | 02/08/2018        | 15:59:00     | 15              |
| 10                 | 2            | 03/08/2018        | 10:46:00     | 10              |
| 12                 | 2            | 04/08/2018        | 12:12:00     | 12              |
| 13                 | 2            | 04/08/2018        | 13:54:00     | 13              |
| 16                 | 1            | 04/08/2018        | 16:15:00     | 16              |
| 3                  | 2            | 05/08/2018        | 03:40:00     | 3               |
| 3                  | 2            | 05/08/2018        | 03:56:00     | 3               |
| 11                 | 2            | 05/08/2018        | 11:42:00     | 11              |
| 13                 | 2            | 05/08/2018        | 13:43:00     | 13              |
| 17                 | 2            | 05/08/2018        | 17:17:00     | 17              |
| 9                  | 2            | 06/08/2018        | 09:19:00     | 9               |
| 10                 | 1            | 06/08/2018        | 10:37:00     | 10              |
| 12                 | 2            | 06/08/2018        | 12:16:00     | 12              |
| 14                 | 1            | 06/08/2018        | 14:39:00     | 14              |
| 14                 | 1            | 06/08/2018        | 14:41:00     | 14              |
| 17                 | 2            | 06/08/2018        | 17:41:00     | 17              |
| 11                 | 2            | 07/08/2018        | 11:04:00     | 11              |
| 18                 | 1            | 07/08/2018        | 18:04:00     | 18              |
| 9                  | 2            | 08/08/2018        | 09:08:00     | 9               |
| 12                 | 1            | 08/08/2018        | 12:51:00     | 12              |
| 0                  | 2            | 09/08/2018        | 00:46:00     | 0               |
| 8                  | 2            | 09/08/2018        | 08:47:00     | 8               |
| 12                 | 1            | 09/08/2018        | 12:44:00     | 12              |
| 17                 | 1            | 09/08/2018        | 17:04:00     | 17              |
| 13                 | 1            | 10/08/2018        | 13:45:00     | 13              |
| 6                  | 2            | 11/08/2018        | 06:49:00     | 6               |
| 6                  | 2            | 11/08/2018        | 06:51:00     | 6               |
| 10                 | 2            | 11/08/2018        | 10:07:00     | 10              |
| 14                 | 1            | 11/08/2018        | 14:31:00     | 14              |
| 9                  | 1            | 12/08/2018        | 09:27:00     | 9               |

| Actual Time Seen | DayofWeek_F | Presenting_complaint                   | Dept_Ar | Wait_Time |
|------------------|-------------|----------------------------------------|---------|-----------|
| 12:23:00         | 1           | L HIP PAIN                             | Majors  | 167       |
| 15:00:00         | 1           | NAUSEAOUS/ Gastroenterology Urology P. | Majors  | 76        |
| 15:19:00         | 1           | SEVERE Gastroenterology PAIN           | Majors  | 81        |
| 16:14:00         | 1           | sternum pain                           | Majors  | 133       |
| 16:10:00         | 1           | gp ltr loin pain / fever /vomi         | Majors  | 129       |
| 17:07:00         | 1           | UNWELL                                 | Majors  | 102       |
| 17:17:00         | 1           | Gastroenterology pain/vomiting         | Majors  | 92        |
| 18:53:00         | 1           | Infection under L arm antibioti        | UTC     | 101       |
| 8:17:00          | 1           | ?infection r leg                       | UTC     | 94        |
| 9:07:00          | 1           | Gastroenterology PAIN                  | Majors  | 93        |
| 10:10:00         | 1           | MENTAL HEALTH                          | Majors  | 68        |
| 10:24:00         | 1           | C/A PT ON CHEMO HIGH TEMP MOUT         | Majors  | 65        |
| 12:00:00         | 1           | ? SPIKED DRINK / PALPITATIONS          | Majors  | 62        |
| 13:44:00         | 1           | Gastroenterology PAIN NAUSEAOUS/ DIZZ  | Majors  | 104       |
| 14:59:00         | 1           | Urology STONES                         | Majors  | 172       |
| 15:28:00         | 1           | HERNIA PAIN                            | Majors  | 171       |
| 14:16:00         | 1           | MSK Cardiology                         | Majors  | 87        |
| 16:56:00         | 1           | ref by gp / re bloods                  | Majors  | 197       |
| 14:29:00         | 1           | BLEEDING ULCER R FOOT                  | Majors  | 35        |
| 19:02:00         | 1           | HEADACHES                              | Majors  | 183       |
| 11:45:00         | 2           | LOW HB                                 | Resus   | 59        |
| 14:54:00         | 2           | R HIP PAIN                             | Majors  | 162       |
| 16:30:00         | 2           | VISION PROBLEMS                        | Majors  | 156       |
| 18:12:00         | 2           | BLUE CALL - Sepsis                     | Majors  | 68        |
| 5:00:00          | 2           | Urology pain ? stones                  | Majors  | 80        |
| 7:45:00          | 2           | Gastroenterology pain                  | Majors  | 229       |
| 14:22:00         | 2           | PR BLEED HAEMMOROID                    | Majors  | 160       |
| 15:17:00         | 2           | took ecstasy + ketamine                | Majors  | 94        |
| 18:50:00         | 1           | 24/40 constipated                      | Majors  | 93        |
| 11:07:00         | 1           | BLOOD IN URINE                         | Majors  | 108       |
| 11:54:00         | 1           | PR BLEED RECTAL PAIN                   | Majors  | 77        |
| 13:16:00         | 1           | Gastroenterology PAIN VOMITING         | Majors  | 60        |
| 17:39:00         | 1           | pins needles arms                      | Majors  | 180       |
| 16:33:00         | 1           | FALL                                   | Majors  | 112       |
| 18:50:00         | 1           | wound prob                             | Majors  | 69        |
| 12:28:00         | 1           | chest back pain                        | Majors  | 84        |
| 19:10:00         | 1           | Gastroenterology pain                  | Majors  | 66        |
| 10:21:00         | 1           | chest tightness/ sob                   | Majors  | 73        |
| 15:51:00         | 1           | hypertension                           | Resus   | 90        |
| 3:00:00          | 1           | groin pain                             | Majors  | 134       |
| 10:47:00         | 1           | pounding head/?tonsillitis/ins         | Majors  | 120       |
| 16:00:00         | 1           | irregular heart                        | Majors  | 196       |
| 17:30:00         | 1           | priority                               | Majors  | 26        |
| 14:41:00         | 2           | Reduced mobility                       | Majors  | 56        |
| 9:09:00          | 2           | blood test results                     | Majors  | 140       |
| 9:33:00          | 2           | urine concern                          | Majors  | 162       |
| 14:00:00         | 2           | dizzy, nausea                          | Majors  | 233       |
| 18:00:00         | 2           | Gastroenterology pain                  | Majors  | 209       |
| 11:43:00         | 2           | MSK RIB INJ                            | Majors  | 136       |

| LOS | LWBS_Formatted | Reattend | Disposal_Formatted | Gender_Formatted | Age |
|-----|----------------|----------|--------------------|------------------|-----|
| 239 | 0              | 0        | 2                  | 1                | 4   |
| 228 | 0              | 0        | 1                  | 1                | 4   |
| 86  | 0              | 0        | 1                  | 1                | 3   |
| 141 | 0              | 0        | 1                  | 1                | 3   |
| 204 | 0              | 0        | 2                  | 1                | 2   |
| 215 | 0              | 0        | 2                  | 2                | 4   |
| 187 | 0              | 0        | 1                  | 1                | 4   |
| 163 | 0              | 0        | 1                  | 2                | 3   |
| 143 | 0              | 1        | 1                  | 2                | 3   |
| 236 | 0              | 0        | 2                  | 1                | 4   |
| 238 | 0              | 0        | 1                  | 1                | 2   |
| 221 | 0              | 0        | 2                  | 2                | 3   |
| 157 | 0              | 0        | 1                  | 2                | 3   |
| 201 | 0              | 0        | 1                  | 2                | 2   |
| 180 | 0              | 1        | 1                  | 2                | 3   |
| 238 | 0              | 0        | 1                  | 2                | 2   |
| 236 | 0              | 1        | 2                  | 1                | 4   |
| 239 | 0              | 0        | 1                  | 2                | 4   |
| 236 | 0              | 0        | 2                  | 2                | 3   |
| 236 | 0              | 0        | 1                  | 1                | 2   |
| 404 | 0              | 0        | 2                  | 2                | 3   |
| 235 | 0              | 0        | 1                  | 2                | 4   |
| 231 | 0              | 0        | 2                  | 2                | 2   |
| 205 | 0              | 0        | 2                  | 1                | 2   |
| 215 | 0              | 0        | 1                  | 2                | 3   |
| 229 | 0              | 1        | 2                  | 2                | 3   |
| 212 | 0              | 0        | 1                  | 1                | 4   |
| 167 | 0              | 0        | 2                  | 2                | 1   |
| 150 | 0              | 0        | 1                  | 1                | 2   |
| 146 | 0              | 0        | 1                  | 2                | 4   |
| 143 | 0              | 0        | 1                  | 1                | 4   |
| 194 | 0              | 0        | 2                  | 2                | 4   |
| 209 | 0              | 0        | 1                  | 1                | 4   |
| 229 | 0              | 0        | 2                  | 2                | 4   |
| 199 | 0              | 0        | 1                  | 2                | 2   |
| 235 | 0              | 0        | 1                  | 2                | 2   |
| 126 | 0              | 1        | 1                  | 1                | 2   |
| 177 | 0              | 0        | 1                  | 1                | 4   |
| 494 | 0              | 0        | 2                  | 2                | 4   |
| 234 | 0              | 0        | 1                  | 2                | 2   |
| 173 | 0              | 0        | 2                  | 1                | 3   |
| 236 | 0              | 0        | 2                  | 2                | 3   |
| 202 | 0              | 0        | 2                  | 1                | 4   |
| 205 | 0              | 0        | 2                  | 1                | 4   |
| 151 | 0              | 1        | 1                  | 1                | 4   |
| 239 | 0              | 0        | 2                  | 1                | 4   |
| 238 | 0              | 0        | 1                  | 1                | 3   |
| 239 | 0              | 0        | 2                  | 2                | 4   |
| 213 | 0              | 0        | 1                  | 1                | 4   |
